# Supplementary material for: Optimization of a NiMo catalytic electrode based on the distribution map of HER onset potential
Source: Royal Society of Chemistry journal article supplement (doi:10.1039/d3ta07888d), 2024-01-01
Supplement: d3ta07888d1.pdf [file d3ta07888d1.pdf]

## Supporting Information for

### *Optimization of NiMo catalytic electrode based on the distribution map of HER onset potential*

Xuyang Ma,<sup>a</sup> Jiqiang Dong,<sup>a</sup> Fuying Li,<sup>a</sup> Kaijie Ma,<sup>b</sup> Le Liu<sup>\*a</sup> and Jingyu Xi<sup>\*a</sup>

## Contents for supporting information

**Table S1** 2<sup>4</sup>-factor design of NiMo catalyst experiment for electrodeposition on nickel foam substrate

**Table S2** 16 groups of electrode samples under 2<sup>4</sup>-factor design

**Table S3** Preparation conditions of 16 groups of electrode samples

**Table S4** Width and median of box plot of 16 groups of electrode surface onset potential under 2<sup>4</sup>-factor design

**Table S5** ANOVA table of 2<sup>4</sup>-factor design

**Figure S1** 16 groups of nickel foam substrate NiMo electrodes to be tested

**Figure S2** The HER onset potential distribution maps 16 groups under 2<sup>4</sup>-factor design

**Figure S3** LSV test plots for the investigation of optimal electrode preparation parameters

**Figure S4** XRD pattern of NiMo electrode samples

**Figure S5** XRS pattern of NiMo electrode samples

**Figure S6** EDS pattern of NiMo electrode samples

**Figure S7** Experimental results of commercial HER electrode testing

**Table S1** 2<sup>4</sup>-factor design of NiMo catalyst experiment for electrodeposition on nickel foam substrate

| $c(\text{Mo}^{6+})$<br>(M) | $c(\text{Ni}^{2+})$<br>(M) | Current density<br>(mA cm <sup>-2</sup> ) | Electrodeposition time<br>(min) |
|----------------------------|----------------------------|-------------------------------------------|---------------------------------|
| 0.1                        | 0.2                        | 20                                        | 5                               |
| 0.3                        | 0.6                        | 60                                        | 15                              |

**Table S2** 16 groups of electrode samples under 2<sup>4</sup>-factor design

| Number | $c(\text{Mo}^{6+})$<br>(M) | $c(\text{Ni}^{2+})$<br>(M) | Current density<br>(mA cm <sup>-2</sup> ) | Electrodeposition time<br>(min) |
|--------|----------------------------|----------------------------|-------------------------------------------|---------------------------------|
| E1     | 0.1                        | 0.2                        | 20                                        | 5                               |
| E2     | 0.1                        | 0.2                        | 20                                        | 15                              |
| E3     | 0.1                        | 0.2                        | 60                                        | 5                               |
| E4     | 0.1                        | 0.2                        | 60                                        | 15                              |
| E5     | 0.1                        | 0.6                        | 20                                        | 5                               |
| E6     | 0.1                        | 0.6                        | 20                                        | 15                              |
| E7     | 0.1                        | 0.6                        | 60                                        | 5                               |
| E8     | 0.1                        | 0.6                        | 60                                        | 15                              |
| E9     | 0.3                        | 0.2                        | 20                                        | 5                               |
| E10    | 0.3                        | 0.2                        | 20                                        | 15                              |
| E11    | 0.3                        | 0.2                        | 60                                        | 5                               |
| E12    | 0.3                        | 0.2                        | 60                                        | 15                              |
| E13    | 0.3                        | 0.6                        | 20                                        | 5                               |
| E14    | 0.3                        | 0.6                        | 20                                        | 15                              |
| E15    | 0.3                        | 0.6                        | 60                                        | 5                               |
| E16    | 0.3                        | 0.6                        | 60                                        | 15                              |

**Table S3** Preparation conditions of 16 groups of electrode samples

| Number | $m(\text{Na}_2\text{MoO}_4 \cdot 2\text{H}_2\text{O})$<br>(g) | $m(\text{NiSO}_4 \cdot 6\text{H}_2\text{O})$<br>(g) | Current density<br>(mA cm <sup>-2</sup> ) | Electrodeposition time<br>(min) |
|--------|---------------------------------------------------------------|-----------------------------------------------------|-------------------------------------------|---------------------------------|
| E1     | 0.7259                                                        | 1.5771                                              | 32                                        | 5                               |
| E2     | 0.7259                                                        | 1.5771                                              | 32                                        | 15                              |
| E3     | 0.7259                                                        | 1.5771                                              | 96                                        | 5                               |
| E4     | 0.7259                                                        | 1.5771                                              | 96                                        | 15                              |
| E5     | 0.7259                                                        | 4.7313                                              | 32                                        | 5                               |
| E6     | 0.7259                                                        | 4.7313                                              | 32                                        | 15                              |

|     |        |        |    |    |
|-----|--------|--------|----|----|
| E7  | 0.7259 | 4.7313 | 96 | 5  |
| E8  | 0.7259 | 4.7313 | 96 | 15 |
| E9  | 2.1776 | 1.5771 | 32 | 5  |
| E10 | 2.1776 | 1.5771 | 32 | 15 |
| E11 | 2.1776 | 1.5771 | 96 | 5  |
| E12 | 2.1776 | 1.5771 | 96 | 15 |
| E13 | 2.1776 | 4.7313 | 32 | 5  |
| E14 | 2.1776 | 4.7313 | 32 | 15 |
| E15 | 2.1776 | 4.7313 | 96 | 5  |
| E16 | 2.1776 | 4.7313 | 96 | 15 |

**Table S4** Width and median of box plot of 16 groups of electrode surface onset potential under 2<sup>4</sup>-factor design

| Number | width   | medium    | Number | width   | medium    |
|--------|---------|-----------|--------|---------|-----------|
| E1     | 34.2665 | -93.2968  | E9     | 35.4749 | -107.6578 |
| E2     | 19.3539 | -94.9986  | E10    | 22.4768 | -98.1943  |
| E3     | 19.2211 | -90.1356  | E11    | 28.9047 | -71.3266  |
| E4     | 26.4451 | -111.7350 | E12    | 28.4327 | -80.3224  |
| E5     | 54.8589 | -229.3337 | E13    | 22.0687 | -227.6721 |
| E6     | 55.0508 | -179.5065 | E14    | 46.1354 | -187.0731 |
| E7     | 48.7247 | -100.5535 | E15    | 73.0257 | -116.5413 |
| E8     | 39.3342 | -74.0863  | E16    | 34.3213 | -64.6350  |

**Table S5** ANOVA table of 2<sup>4</sup>-factor design

| Source                   | Sum of Squares | df | Mean Square | F Value | p-value Prob>F |                    |
|--------------------------|----------------|----|-------------|---------|----------------|--------------------|
| A-Mo <sup>6+</sup>       | 1078.67        | 1  | 1078.67     | 0.83    | 0.3822         | not significant    |
| B-Ni <sup>2+</sup>       | 6423.45        | 1  | 6423.45     | 4.93    | <b>0.0483</b>  | <b>significant</b> |
| C-Current density        | 9862.89        | 1  | 9862.89     | 7.58    | <b>0.0188</b>  | <b>significant</b> |
| D-Electrodeposition time | 75.77          | 1  | 75.77       | 0.058   | 0.8138         | not significant    |

**Figure S1** 16 groups of nickel foam substrate NiMo electrodes to be tested

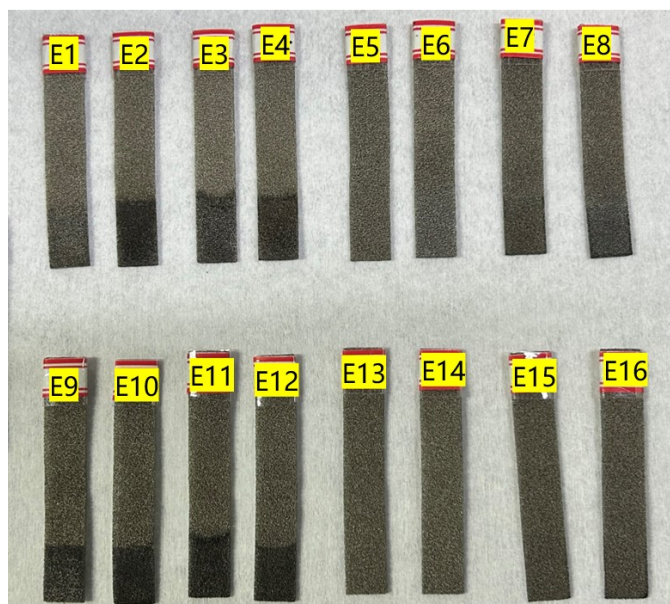

Figure S1 shows 16 sets of electrodes E1-E16 prepared by the electrodeposition method, the average immersion depth is 1.6 cm and the area of the deposited catalytic electrodes is  $1.6 \text{ cm}^2$ . The electrodes are removed and rinsed with deionized water and anhydrous ethanol and dried naturally after deposition.

Figure S2 The HER onset potential distribution maps 16 groups under  $2^4$ -factor design

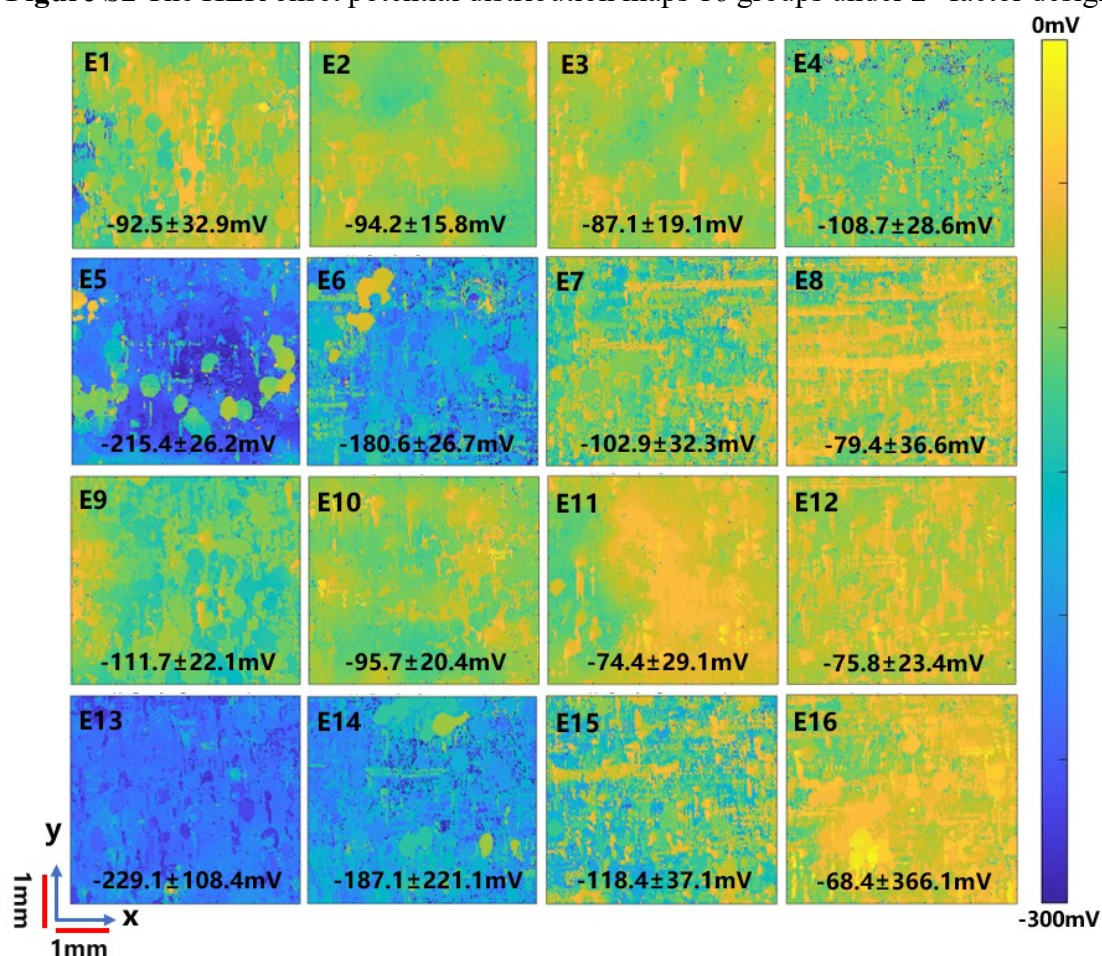

Figure S2 shows the initial potential distribution of 16 groups of electrodes after the test and the "mean  $\pm$  standard deviation" is labelled. It can be seen that the uniformity of electrode E2 is better and the overall catalytic activity of electrode E16 is better, but its uniformity is poor. On the other hand, the distribution plots of electrodes E5, E6, E13 and E14 are blue, indicating that their catalytic activity is poor.

**Figure S3** LSV test curves for the investigation of optimal electrode preparation parameters

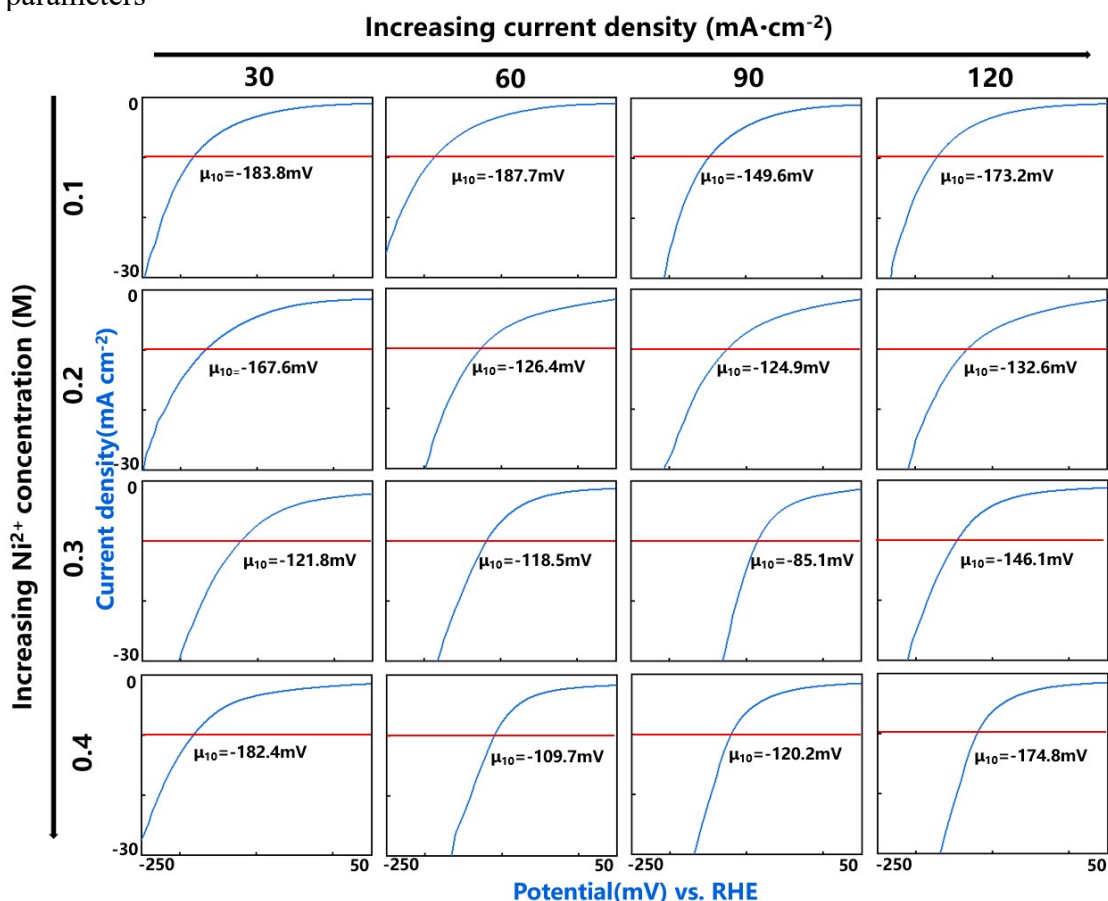

Figure S3 displays the LSV test curves for 16 groups of electrodes when exploring optimal electrode preparation conditions. The figure indicates a minimum overpotential at a  $\text{Ni}^{2+}$  concentration of 0.3 M and a current density of  $90 \text{ mA cm}^{-2}$ , which is consistent with the distribution map of HER onset potential.

**Figure S4** XRD pattern of NiMo electrode samples

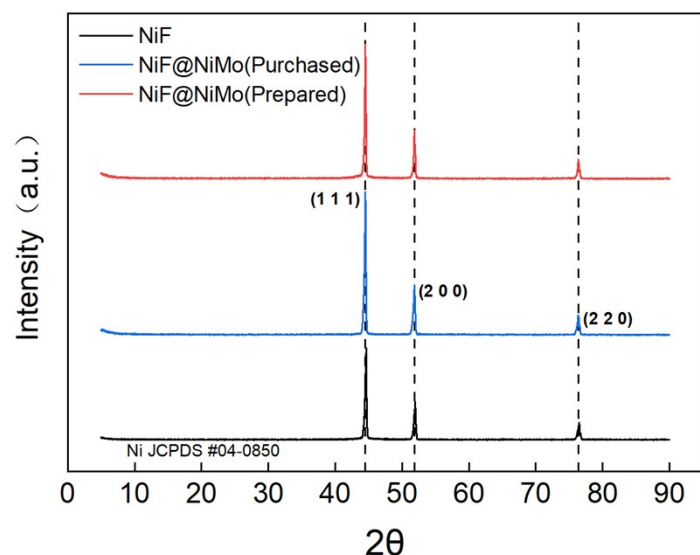

Figure S4 represents the XRD patterns recorded for NiMo electrode samples with different Mo content. The figure displays the XRD curves of pure nickel foam (black line), a purchased commercial NiMo electrode (blue line), and an experimentally prepared NiMo electrode (red line). The diffraction peaks located at  $2\theta \approx 44.6^\circ$ ,  $51.8^\circ$ , and  $76.4^\circ$  are assigned to the (111), (200), and (220) Ni facets, respectively (JCPDS No. 04-0850). The absence of distinct Mo peaks indicates that the plated layer has no single phase of Mo. Noticeably, there is no obvious peak for NiMo alloy due to the small actual Mo concentration. However, diffraction peaks shifted toward the lower  $2\theta$  values, which can be attributed to the lattice expansion due to the successful incorporation of Mo into Ni<sup>1</sup>.

**Figure S5** XPS pattern of NiMo electrode samples

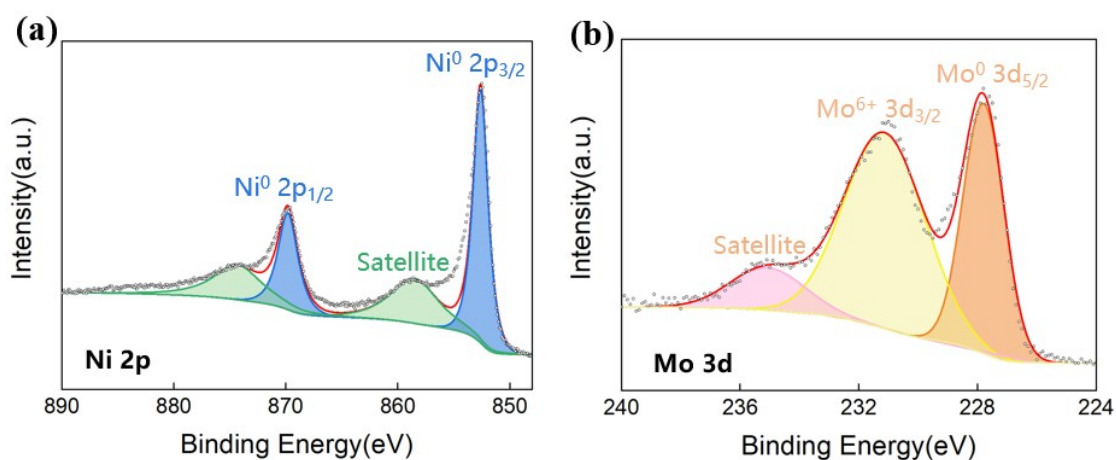

Figure S5 represents the EDS patterns recorded for the NiMo electrode prepared by the experiment. To further confirm the chemical composition and electronic states of the

prepared nanowire arrays electrode, an X-ray photoelectron spectroscopy (XPS) investigation was conducted. Figure S5a-b represents the XPS spectra of the NiMo electrode for Ni 2p and Mo 3d, respectively. Ni 2p spectrum shows two main peaks at 852.6 and 869.5 eV, accompanied by two broad satellite peaks, which correspond to metallic Ni.<sup>2</sup> While, in the case of the Mo 3d spectrum, the prominent peak appearing at 227.9 eV can be indexed to metallic Mo, and the peak located at 231.1 eV is referred to as the Mo<sup>6+</sup> state.<sup>3</sup>

**Figure S6** EDS pattern of NiMo electrode samples

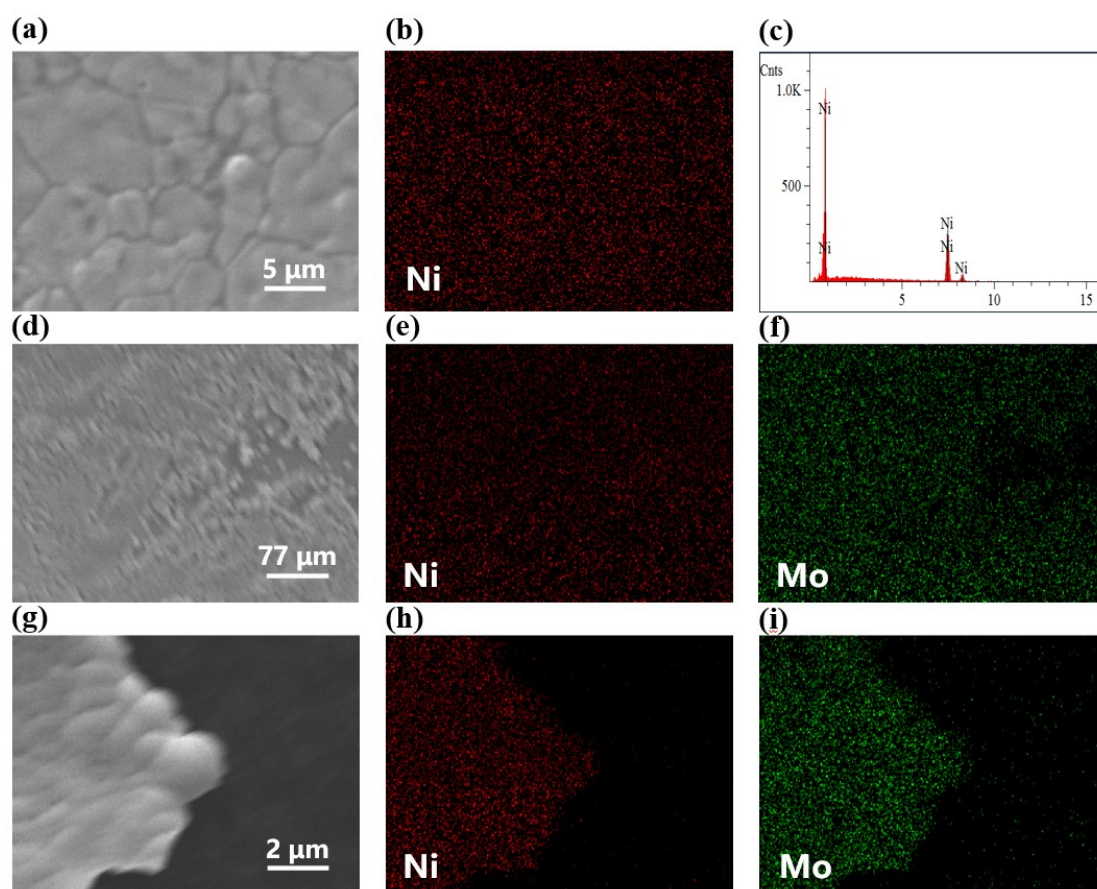

Figure S6 represents the EDS patterns recorded for NiMo electrode samples with different Mo content. Figures S6a-c show SEM maps and Ni and Mo elemental mapping images of pure nickel foam, Figures S6d-f show corresponding figures of purchased commercial NiMo electrodes, and Figures S6g-i show corresponding figures of NiMo electrodes prepared by experiment. The figure illustrates that the commercial NiMo electrodes purchased have slightly uneven Ni and Mo elements. Figures S6g-i demonstrate that NiMo coatings were successfully obtained through electrodeposition experiments with good uniformity.

**Figure S7** Experimental results of commercial HER electrode testing

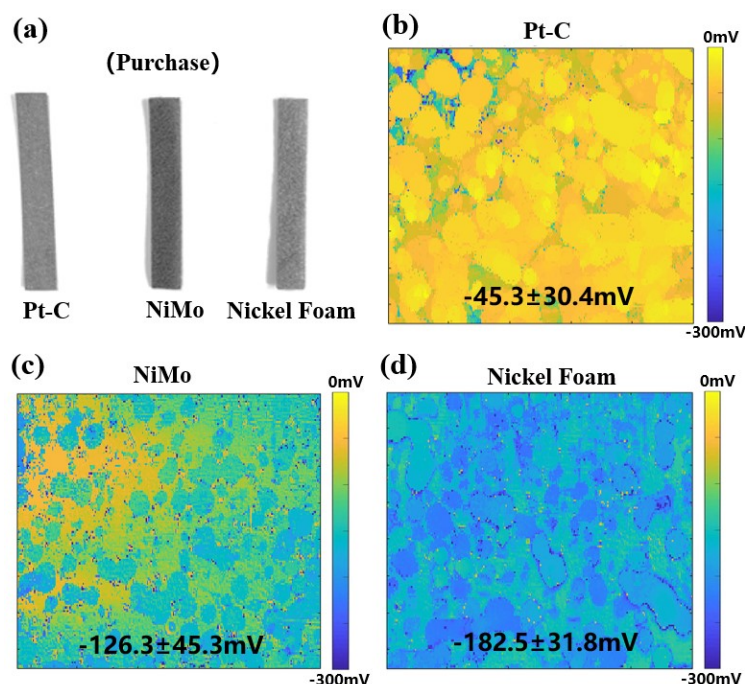

Commercial HER catalytic electrodes, including platinum-plated carbon felts (Pt-C) and nickel-molybdenum foam (NiMo) electrodes, were purchased. A nickel foam (NiF) material without any catalyst loading was used as a control. The electrodes underwent cleaning before examination with the TIRi detection device. The resulting data was processed to produce onset potential distribution maps. The colorbar of the distribution maps was chosen to match the content of the main text, and the values marked on the plots were labeled as 'mean  $\pm$  standard deviation'.

Figures S7b-d demonstrate the onset potential distribution of Pt-C, NiMo, and NiF. The catalytic performance of the Pt-C catalytic electrode is best observed through its color, with an average value of only -45.3 mV, indicating superior performance. The catalytic performance of the purchased NiMo electrode was superior to that of pure nickel foam. This is supported by the lower average index value compared to nickel foam. However, the homogeneity of the NiMo electrode was poorer, with a value of 45.3 mV, which was the highest among the three electrodes tested. This suggests that industrially produced and commercially available HER catalytic electrodes may have good overall performance but uneven distribution. The NiMo electrodes prepared under the optimal conditions in this research exhibit superior overall performance and homogeneity (mean value: -51.6 mV, standard deviation value: 15.3 mV) compared to the purchased NiMo electrodes, demonstrating the significance of this research.



## Reference

1. D. Gao, J. N. Guo, X. Cui, L. Yang, Y. Yang, H. C. He, P. Xiao and Y. H. Zhang, *ACS Appl. Mater. Interfaces*, 2017, **9**, 22420-22431.
2. X. D. Yan, L. H. Tian and X. B. Chen, *J. Power Sources*, 2015, **300**, 336-343.
3. X. Q. Wang, R. Su, H. Aslan, J. Kibsgaard, S. Wendt, L. H. Meng, M. D. Dong, Y. D. Huang and F. Besenbacher, *Nano Energy*, 2015, **12**, 9-18.
